# Supplementary material for: Deep learning quantification reveals a fundamental prognostic role for ductular reaction in biliary atresia
Source: PubMed Central journal article supplement — Hepatol Commun. 2023 Dec 1;7(12):e0333. doi: 10.1097/HC9.0000000000000333 (PMC10697619; doi:10.1097/hc9.0000000000000333), 2023-12-01
Supplement: hc9-7-e0333-s002.pdf [file hc9-7-e0333-s002.pdf]

Supplementary Figure 1. Model training

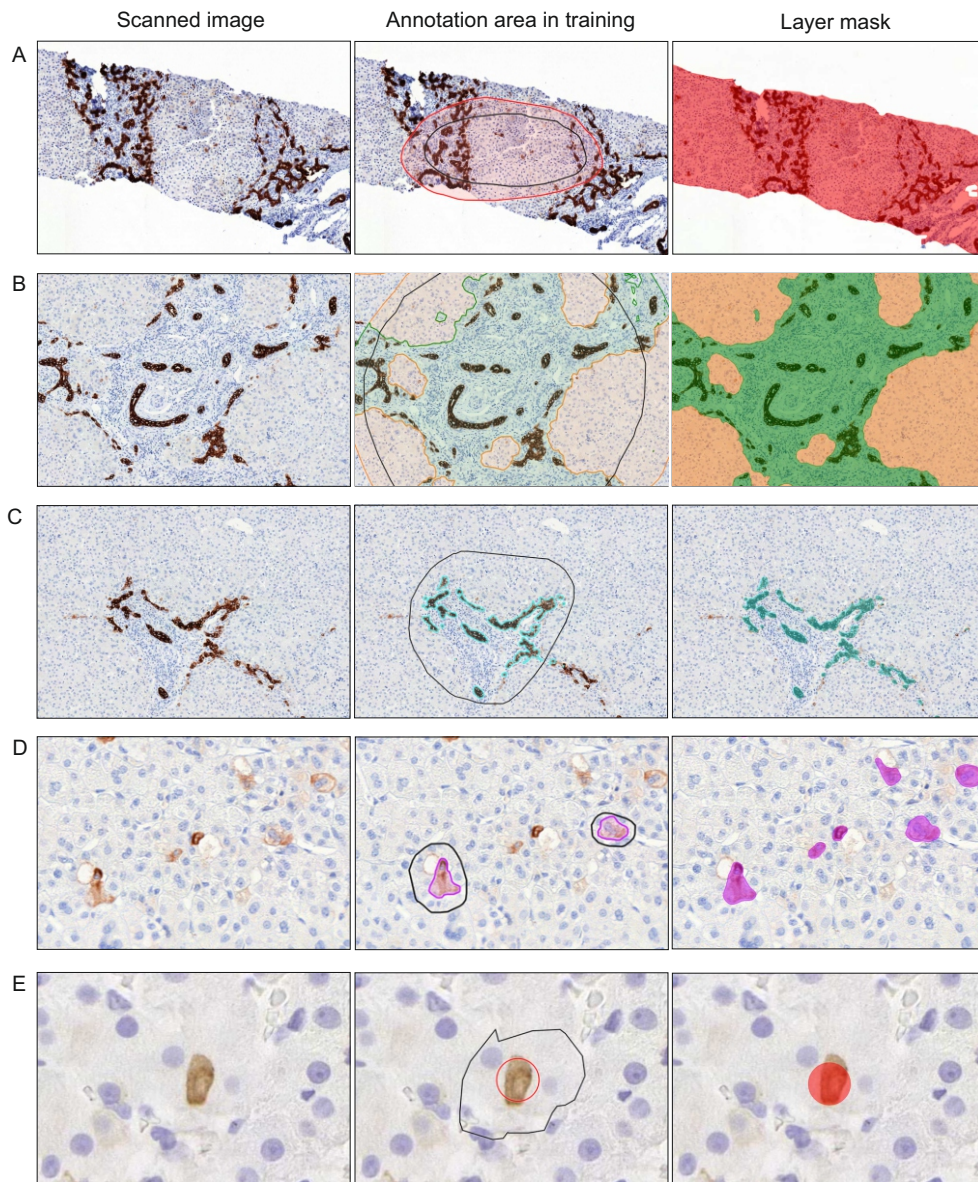

**Supplementary Fig 1. Training of CharBADR model.** Scanned original images, annotation areas in training, and layer masks of (A) liver tissue, (B) liver parenchyma and PA, (C) BE, (D) PIH area, and (E) PIH cells. BE, biliary epithelium; PA, portal area; PIH, parenchymal intermediate hepatocytes.
