# Supplementary material for: Deep learning quantification reveals a fundamental prognostic role for ductular reaction in biliary atresia
Source: PubMed Central journal article supplement — Hepatol Commun. 2023 Dec 1;7(12):e0333. doi: 10.1097/HC9.0000000000000333 (PMC10697619; doi:10.1097/hc9.0000000000000333), 2023-12-01
Supplement: hc9-7-e0333-s003.pdf [file hc9-7-e0333-s003.pdf]

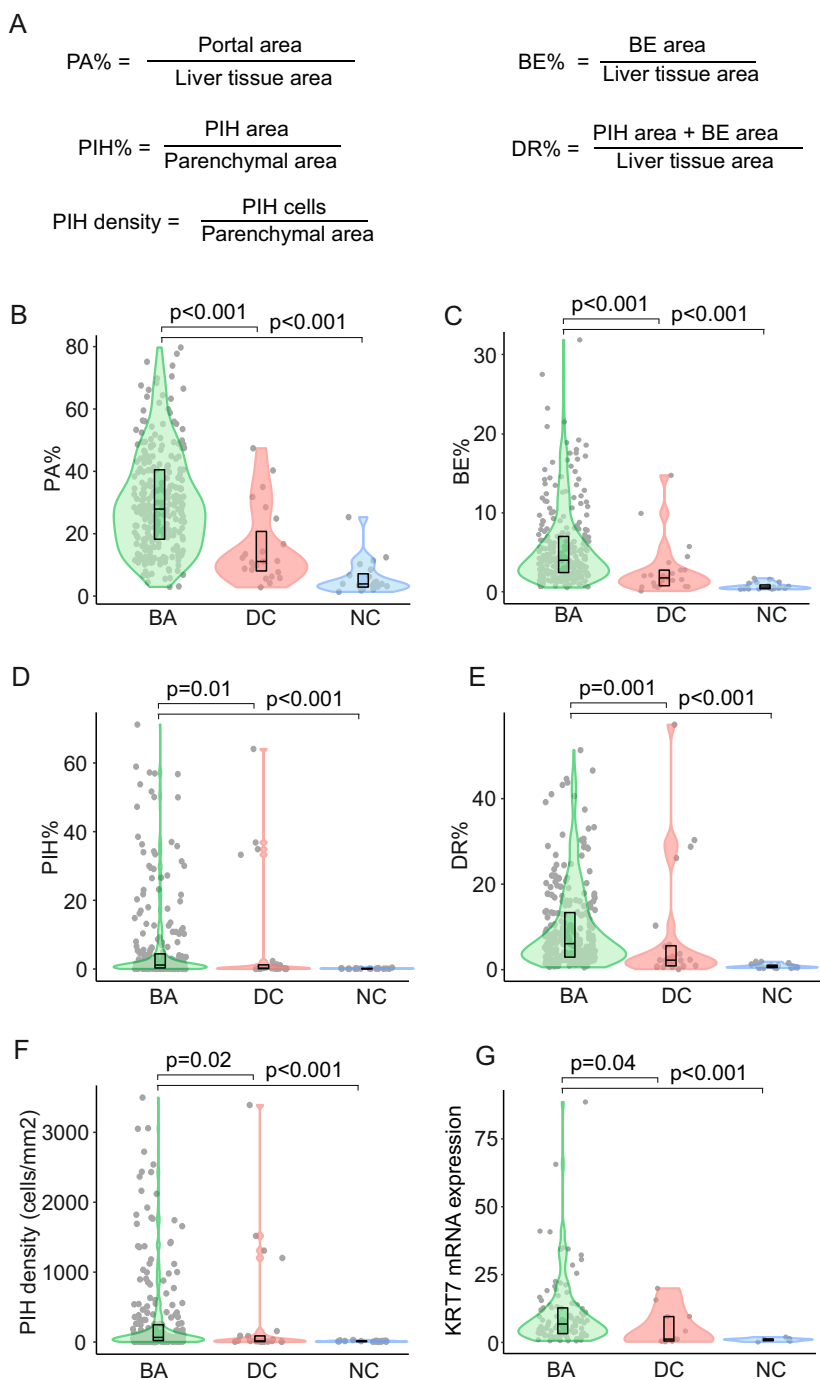

**Supplementary Fig. 2. Formulas for CharBADR components and comparison to controls.** (A) Formulas to calculate CharBADR components. Differences of (B) PA%, (C) BE%, (D) PIH%, (E) DR%, (F) PIH density, and (G) KRT7 mRNA expression between BA patients, cholestatic disease controls, and normal controls. BA, biliary atresia; BE, biliary epithelium; DC, disease control; DR, ductular reaction; KRT7, keratin 7; NC, normal control; PA, portal area; PIH, parenchymal intermediate hepatocytes.
