# Supplementary material for: Deep learning quantification reveals a fundamental prognostic role for ductular reaction in biliary atresia
Source: PubMed Central journal article supplement — Hepatol Commun. 2023 Dec 1;7(12):e0333. doi: 10.1097/HC9.0000000000000333 (PMC10697619; doi:10.1097/hc9.0000000000000333), 2023-12-01
Supplement: hc9-7-e0333-s004.pdf [file hc9-7-e0333-s004.pdf]

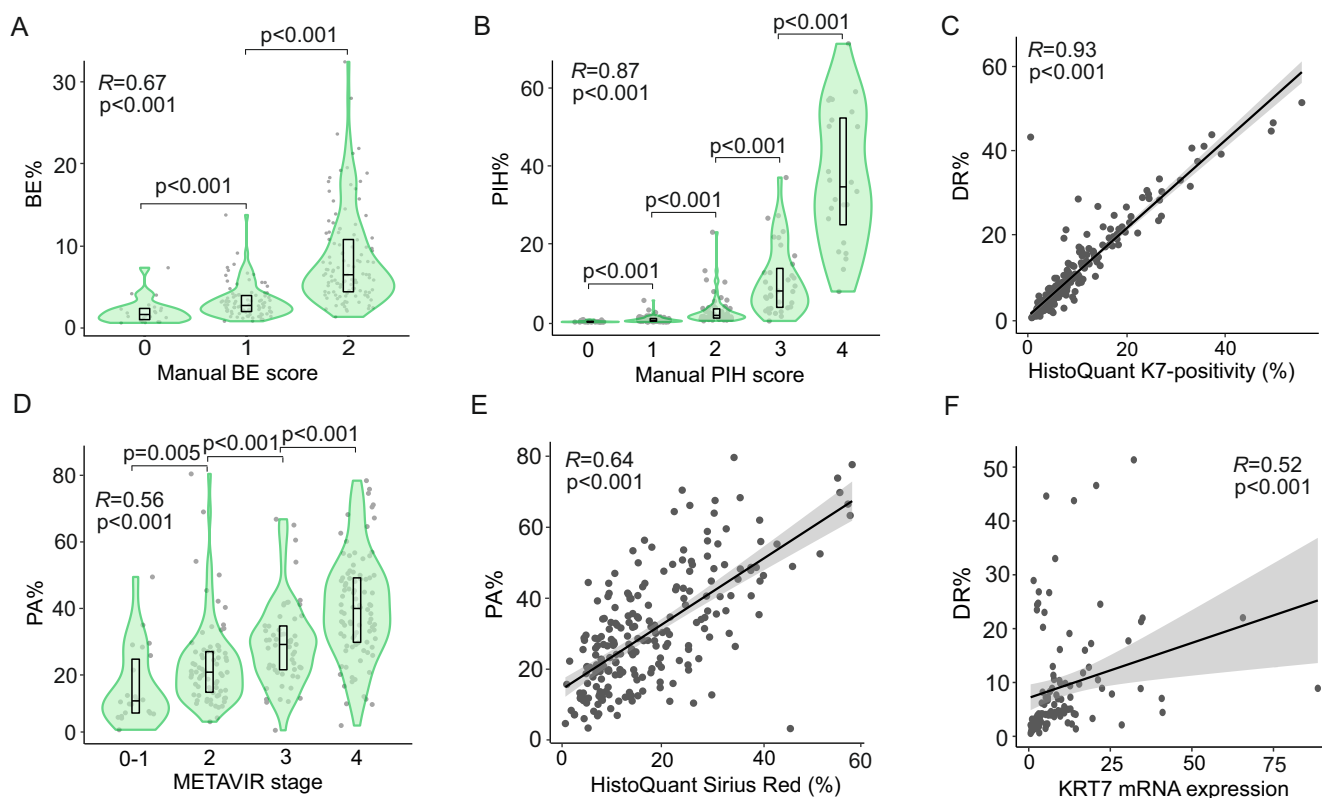

**Supplementary Fig. 3. Validation of CharBADR model.** (A) Spearman rank correlation and comparison with Mann-Whitney U test of BE% with manual BE scores and (B) PIH% with manual PIH scores. (C) Spearman rank correlation between DR% and proportional K7 positive area quantification using HistoQuant. Spearman rank correlation and comparison with Mann-Whitney U test of PA% with (D) Metavir fibrosis stages. (E) Spearman rank correlation between PA% and proportional Sirius Red fibrosis area quantification, and (F) liver KRT7 mRNA expression. The shaded areas represent 95% CI. BE, biliary epithelium; CI, confidence interval; DR, ductular reaction; K7, cytokeratin 7; KRT7, keratin 7; PA, portal area; PIH, parenchymal intermediate hepatocytes
