# Supplementary material for: Deep learning quantification reveals a fundamental prognostic role for ductular reaction in biliary atresia
Source: PubMed Central journal article supplement — Hepatol Commun. 2023 Dec 1;7(12):e0333. doi: 10.1097/HC9.0000000000000333 (PMC10697619; doi:10.1097/hc9.0000000000000333), 2023-12-01
Supplement: hc9-7-e0333-s005.pdf [file hc9-7-e0333-s005.pdf]

Supplementary Figure 4. KPE explanatory factors

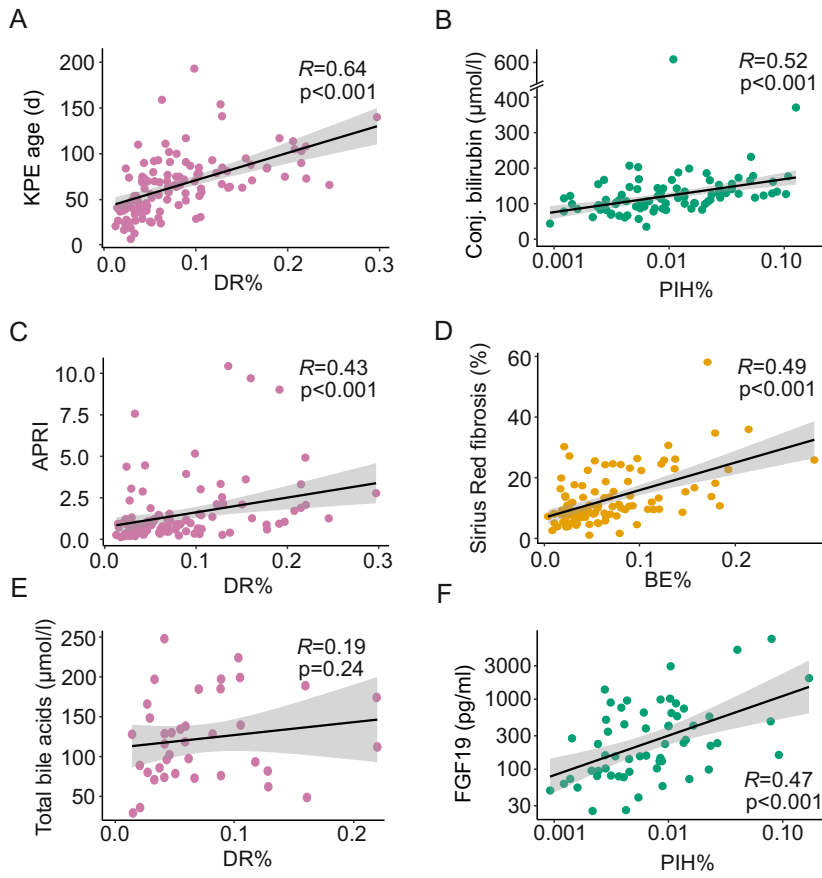

**Supplementary Fig. 4. DR associated with age, bilirubin, fibrosis, and FGF19, but not with serum bile acids, at KPE.** Spearman rank correlations of DR%, BE%, and PIH% with age at KPE, conjugated bilirubin, APRI, proportional Sirius Red fibrosis area, serum total bile acids, and serum FGF19 concentration. The shaded areas represent 95% CI. AST, aspartate transaminase; APRI, AST to platelet ratio index; BE, biliary epithelium; CI, confidence interval; DR, ductular reaction; FGF19, fibroblast growth factor 19; KPE, Kasai portoenterostomy; PIH, parenchymal intermediate hepatocytes.
