# Supplementary material for: Deep learning quantification reveals a fundamental prognostic role for ductular reaction in biliary atresia
Source: PubMed Central journal article supplement — Hepatol Commun. 2023 Dec 1;7(12):e0333. doi: 10.1097/HC9.0000000000000333 (PMC10697619; doi:10.1097/hc9.0000000000000333), 2023-12-01
Supplement: hc9-7-e0333-s006.pdf [file hc9-7-e0333-s006.pdf]

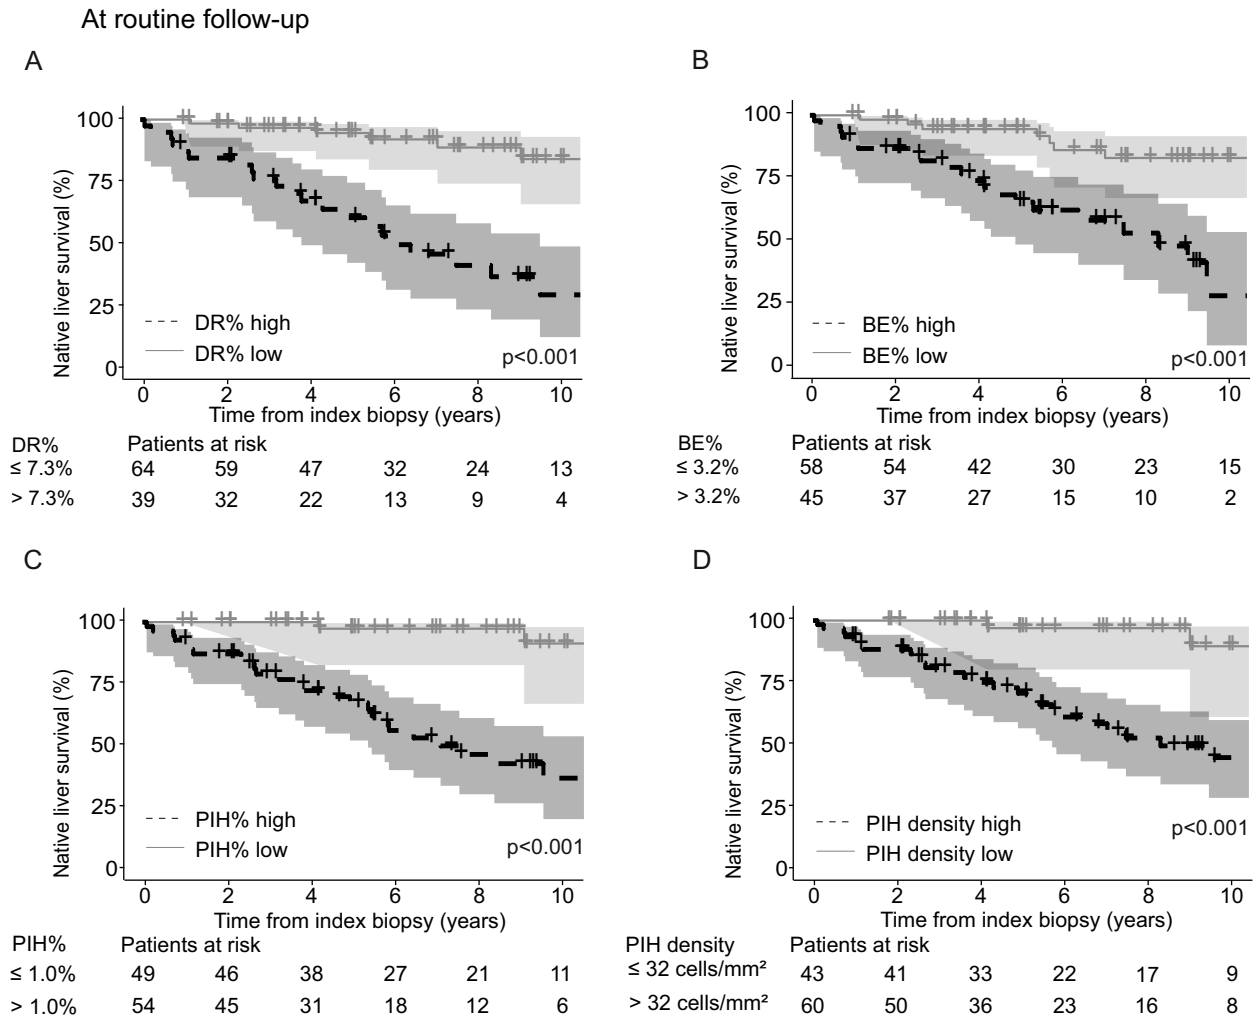

**Supplementary Fig. 5. Native liver survival curves for protocol follow-up biopsy specimens obtained prior to LT.** Kaplan-Meier native liver survival curves according to optimal cut points of (A) DR%, (B) BE%, (C) PIH%, and (D) PIH density calculated using receiver operator characteristics analyses. Patients, who underwent liver biopsy at LT were excluded. The shaded areas of Kaplan-Meier curves represent 95% CI. BE, biliary epithelium; CI, confidence interval; DR, ductular reaction; HR, hazard ratio; LT, liver transplantation; PIH, parenchymal intermediate hepatocytes.
